# Supplementary material for: Skewed Cytokine Responses Rather Than the Magnitude of the Cytokine Storm May Drive Cardiac Dysfunction in Multisystem Inflammatory Syndrome in Children
Source: PubMed Central journal article supplement — J Am Heart Assoc. 2021 Aug 7;10(16):e021428. doi: 10.1161/JAHA.121.021428 (PMC8475050; doi:10.1161/jaha.121.021428), 2021-08-07
Supplement: JAH3-10-e021428-s001.pdf [file JAH3-10-e021428-s001.pdf]

# **SUPPLEMENTAL MATERIAL**

SD = standard deviation; GLS = LV global longitudinal strain; GLSR = LV global longitudinal strain rate;  
GCS = LV global circumferential strain; RVFWS = RV free wall peak longitudinal strain; EDSR<sub>L</sub> = LV end-  
diastolic longitudinal strain rate; LAS = left atrial strain

**Table S1. Left ventricular wall-motion abnormalities are diffusely distributed in MIS-C.**

|                             | Wall motion score index | p-value* |
|-----------------------------|-------------------------|----------|
| Global LV, median [IQI]     | 1.58 [1.31-1.97]        |          |
| LV segments                 |                         | 0.18     |
| Basal                       | 1.67 [1.50-2.00]        |          |
| Mid-cavity                  | 1.67 [1.12-2.00]        |          |
| Apical                      | 1.50 [1.25-2.00]        |          |
| Coronary artery territories |                         | 0.53     |
| LAD                         | 1.75 [1.29-2.00]        |          |
| RCA                         | 1.60 [1.30-2.00]        |          |
| LCX                         | 1.60 [1.20-2.00]        |          |

Left ventricular (LV) segmental and regional wall motion analyzed according to the 17-segment model in N=43 MIS-C cases. The wall motion score index can range from 1 (normal thickening/excursion) to 5 (aneurysmal). \*Kruskal-Wallis test.

IQI = interquartile interval; LAD = left anterior descending; RCA = right coronary artery; LCX = left circumflex artery

**Table S2. Relationship between absolute levels of plasma cytokines and myocardial deformation.**

|                   | GLS |       |         | GCS   |         | RVFWS |         | LAS   |         |
|-------------------|-----|-------|---------|-------|---------|-------|---------|-------|---------|
|                   | N   | r     | p-value | r     | p-value | r     | p-value | r     | p-value |
| ln(IFN $\gamma$ ) | 28  | -0.05 | 0.814   | -0.01 | 0.978   | 0.25  | 0.236   | -0.06 | 0.759   |
| ln(IL-10)         | 28  | 0.09  | 0.659   | -0.06 | 0.778   | 0.20  | 0.341   | -0.05 | 0.809   |
| ln(IL-6)          | 28  | -0.19 | 0.320   | -0.16 | 0.423   | 0.14  | 0.499   | -0.26 | 0.183   |
| ln(IL-8)          | 28  | -0.36 | 0.061   | -0.23 | 0.247   | -0.14 | 0.519   | -0.32 | 0.098   |
| ln(TNF $\alpha$ ) | 28  | -0.16 | 0.413   | -0.19 | 0.338   | -0.01 | 0.974   | -0.25 | 0.202   |

Pearson correlation coefficients (**r**) testing the association between strain parameters and log-transformed absolute values of individual plasma cytokine levels among MIS-C cases with pre-treatment samples (N=28)

GLS = LV global longitudinal strain; GCS = LV global circumferential strain; RVFWS = RV free wall longitudinal strain; LAS = left atrial strain

No estimates met criteria for statistical significance based on the Benjamini-Hochberg critical value for each strain parameter.
